# Supplementary figures and images for: Electronic tagging and population structure of Atlantic bluefin tuna
Source: Springer Nature journal article supplement (doi:10.1038/nature03463), 2005-04-01

Supplementary Figure 1

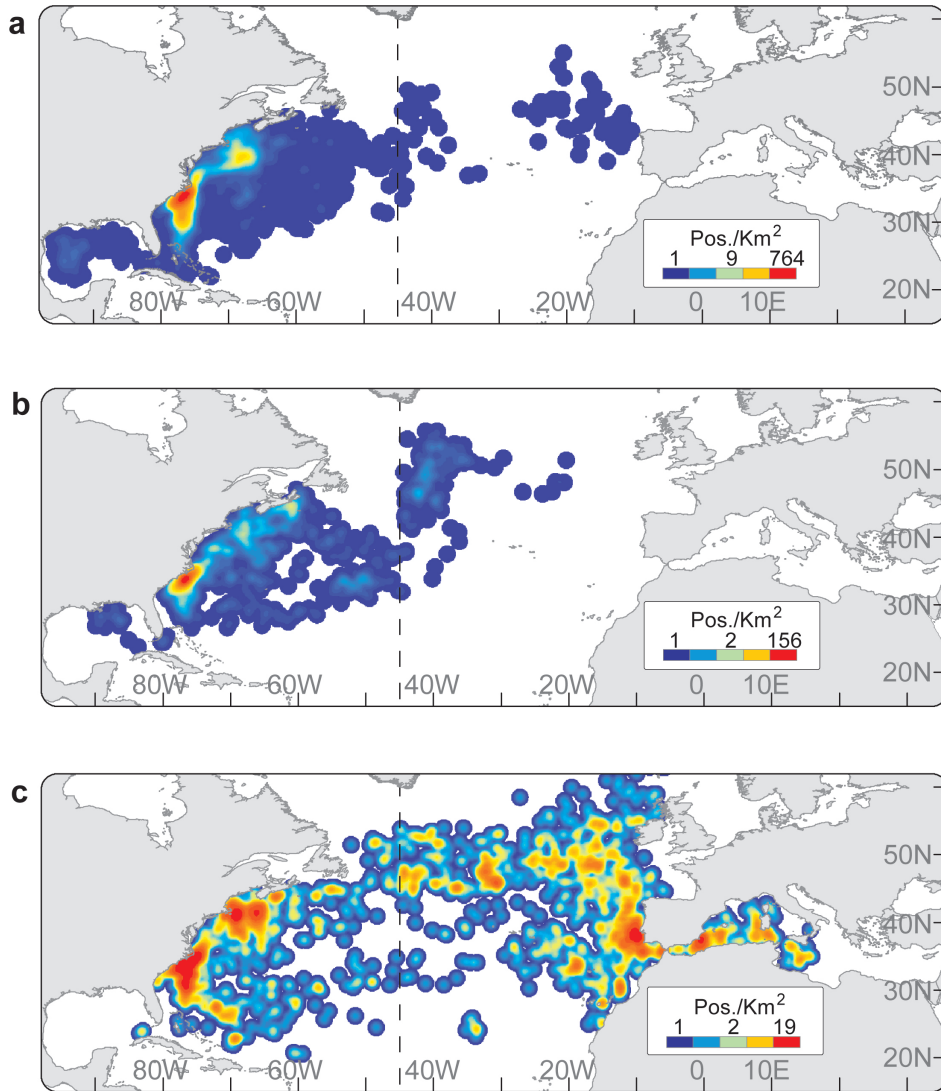

Supplement: 41586_2005_BFnature03463_MOESM1_ESM.pdf [file 41586_2005_BFnature03463_MOESM1_ESM.pdf]

Supplementary Figure 2

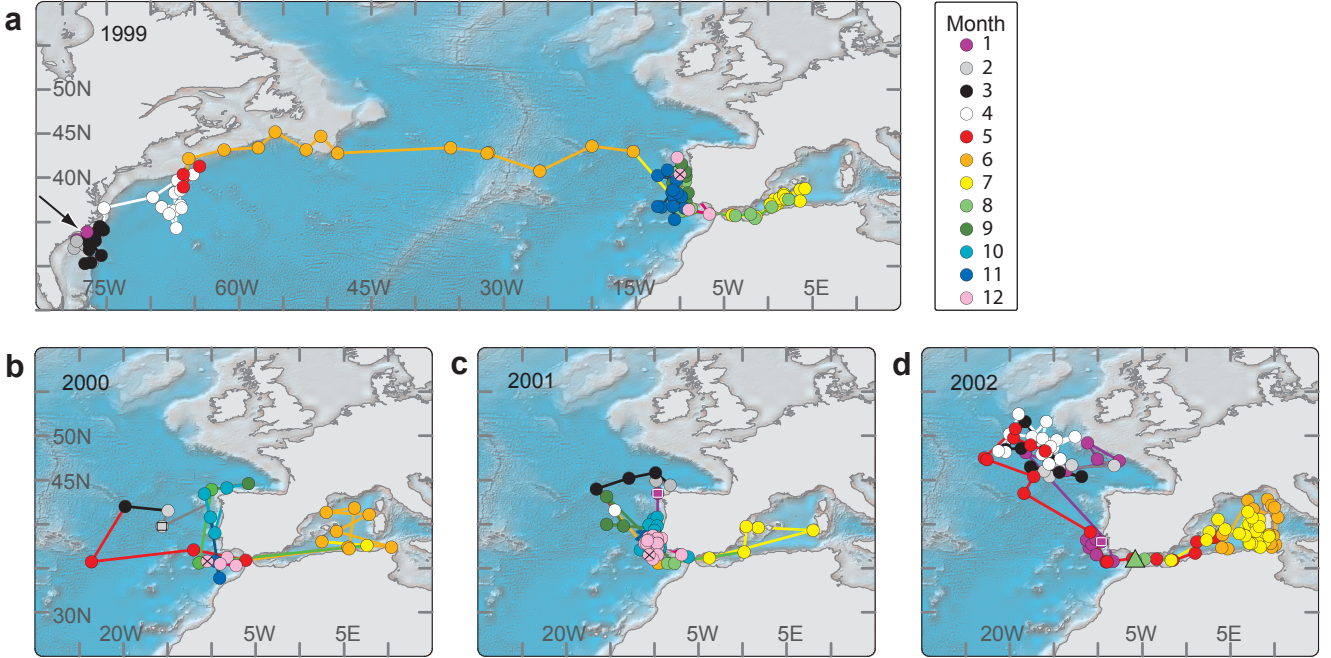

Supplement: 41586_2005_BFnature03463_MOESM2_ESM.pdf [file 41586_2005_BFnature03463_MOESM2_ESM.pdf]

# Supplementary Figure 3

a

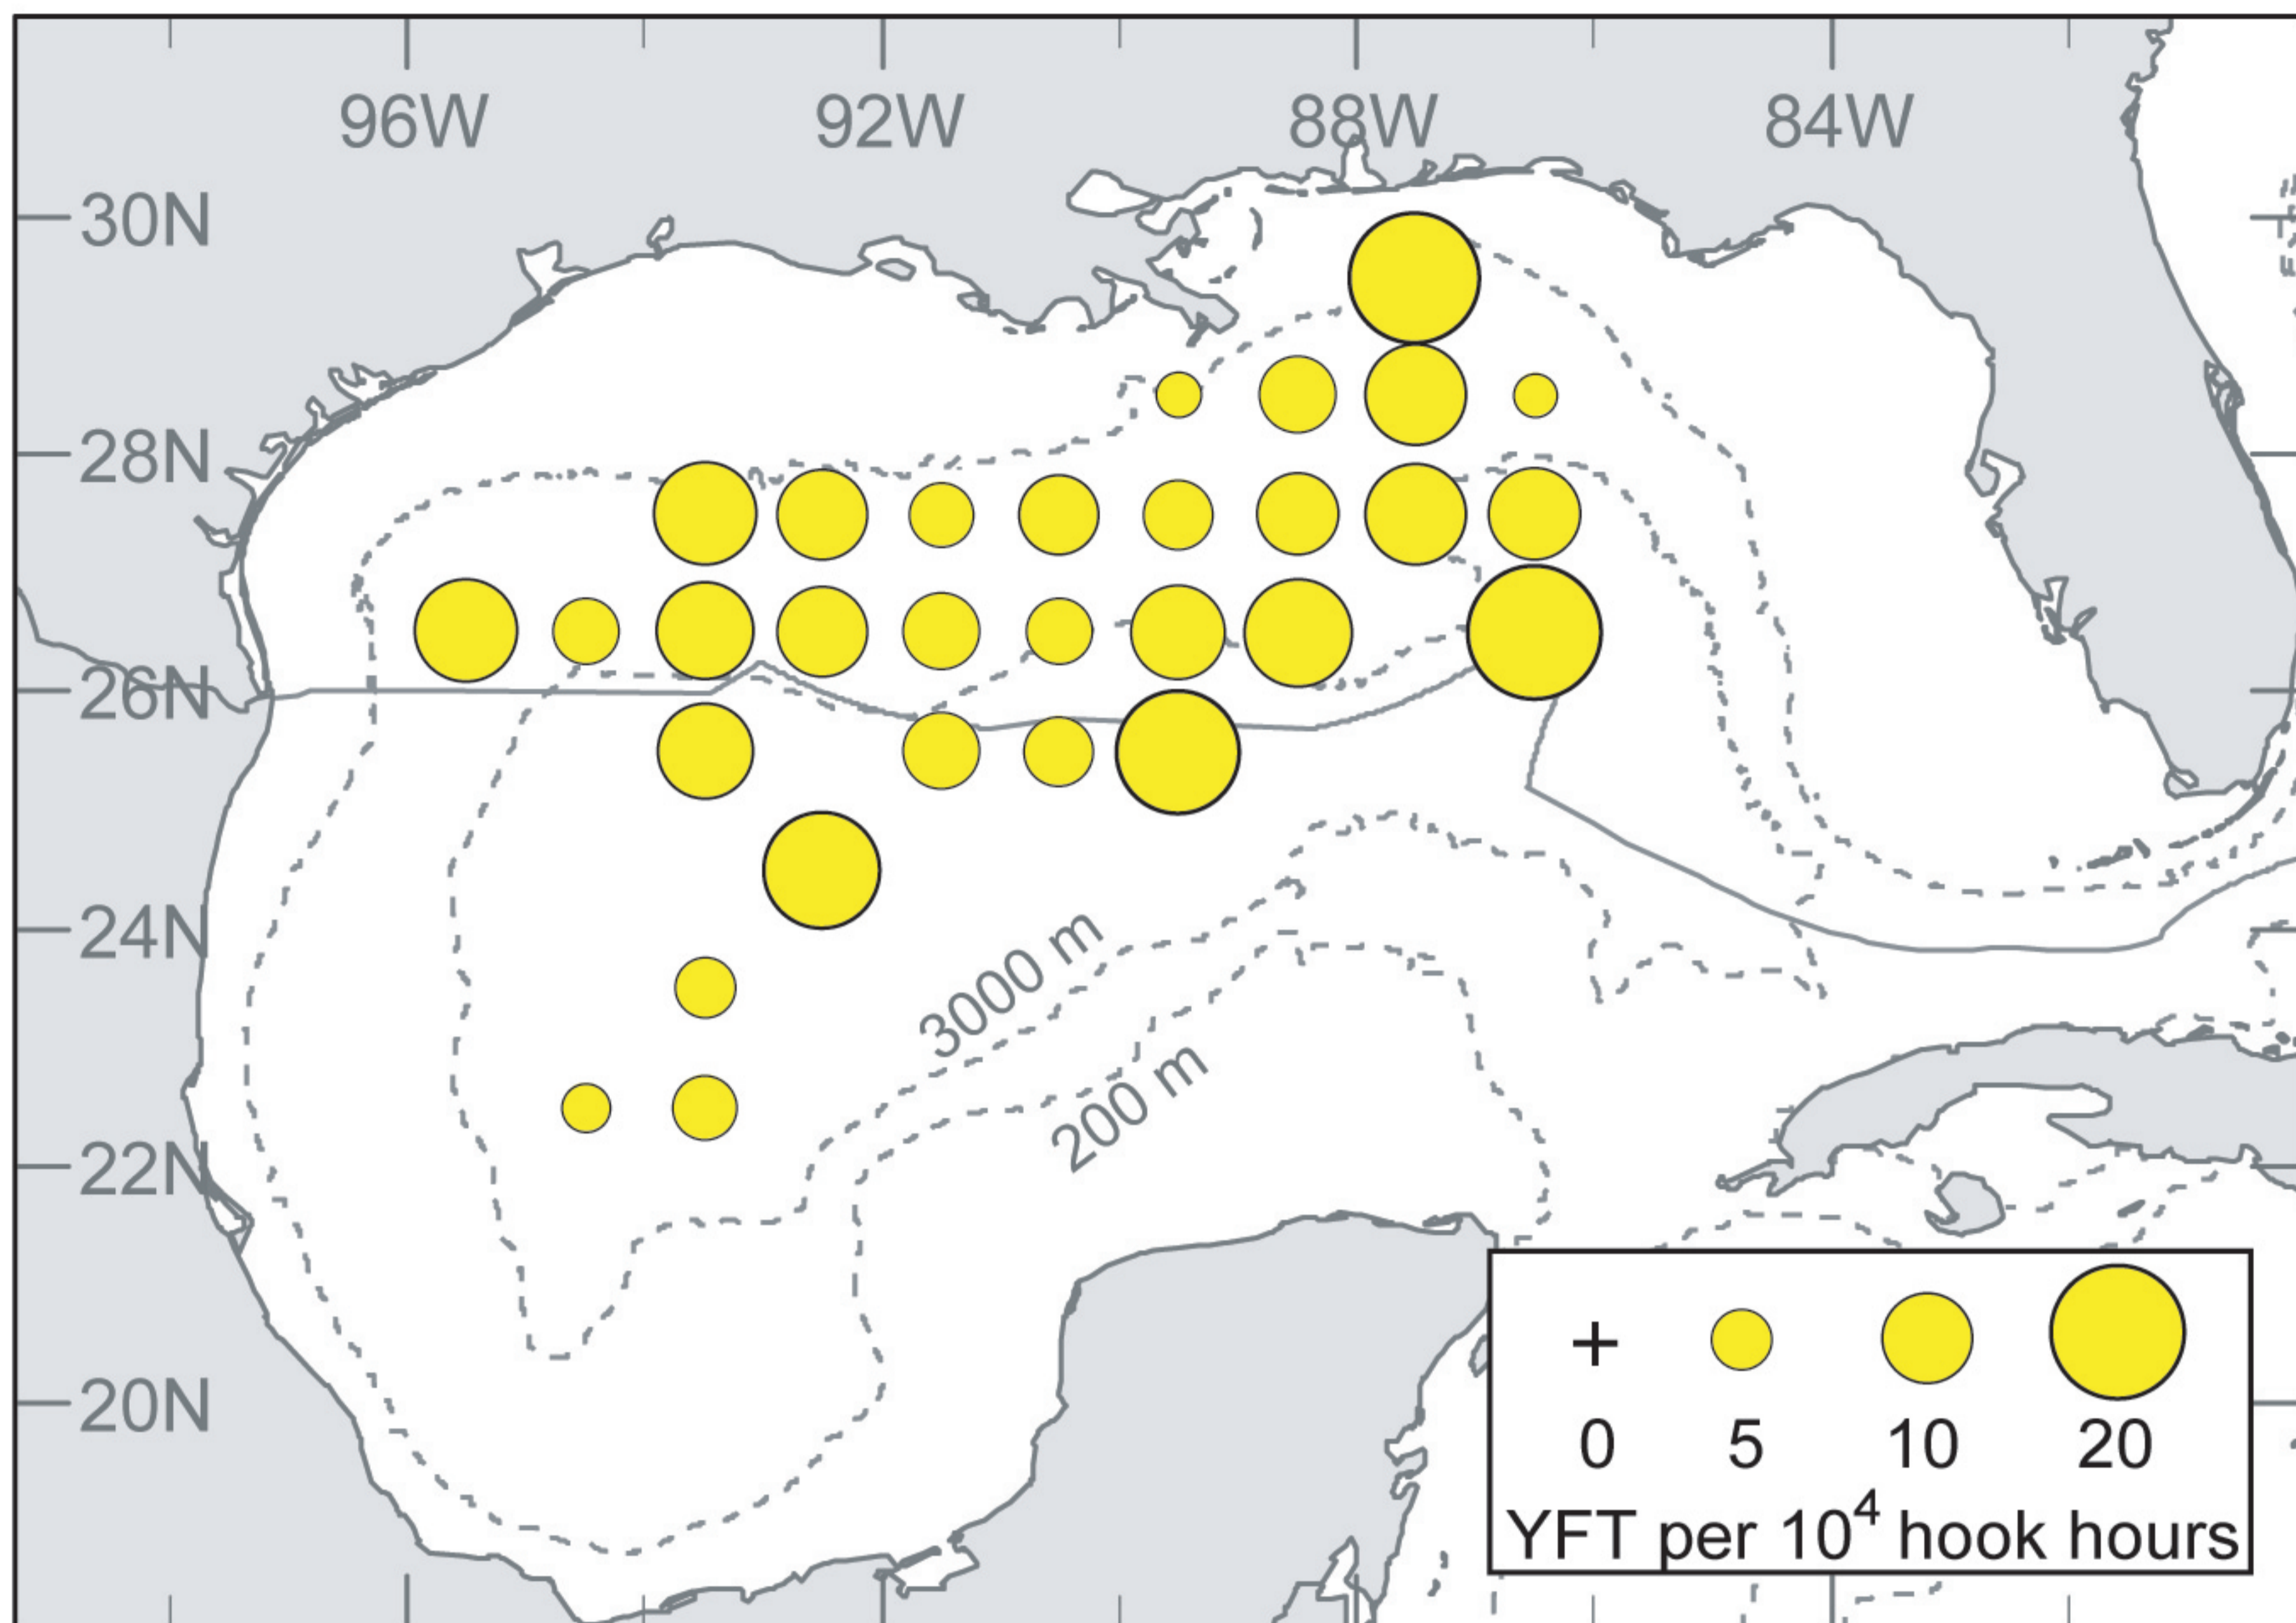

b

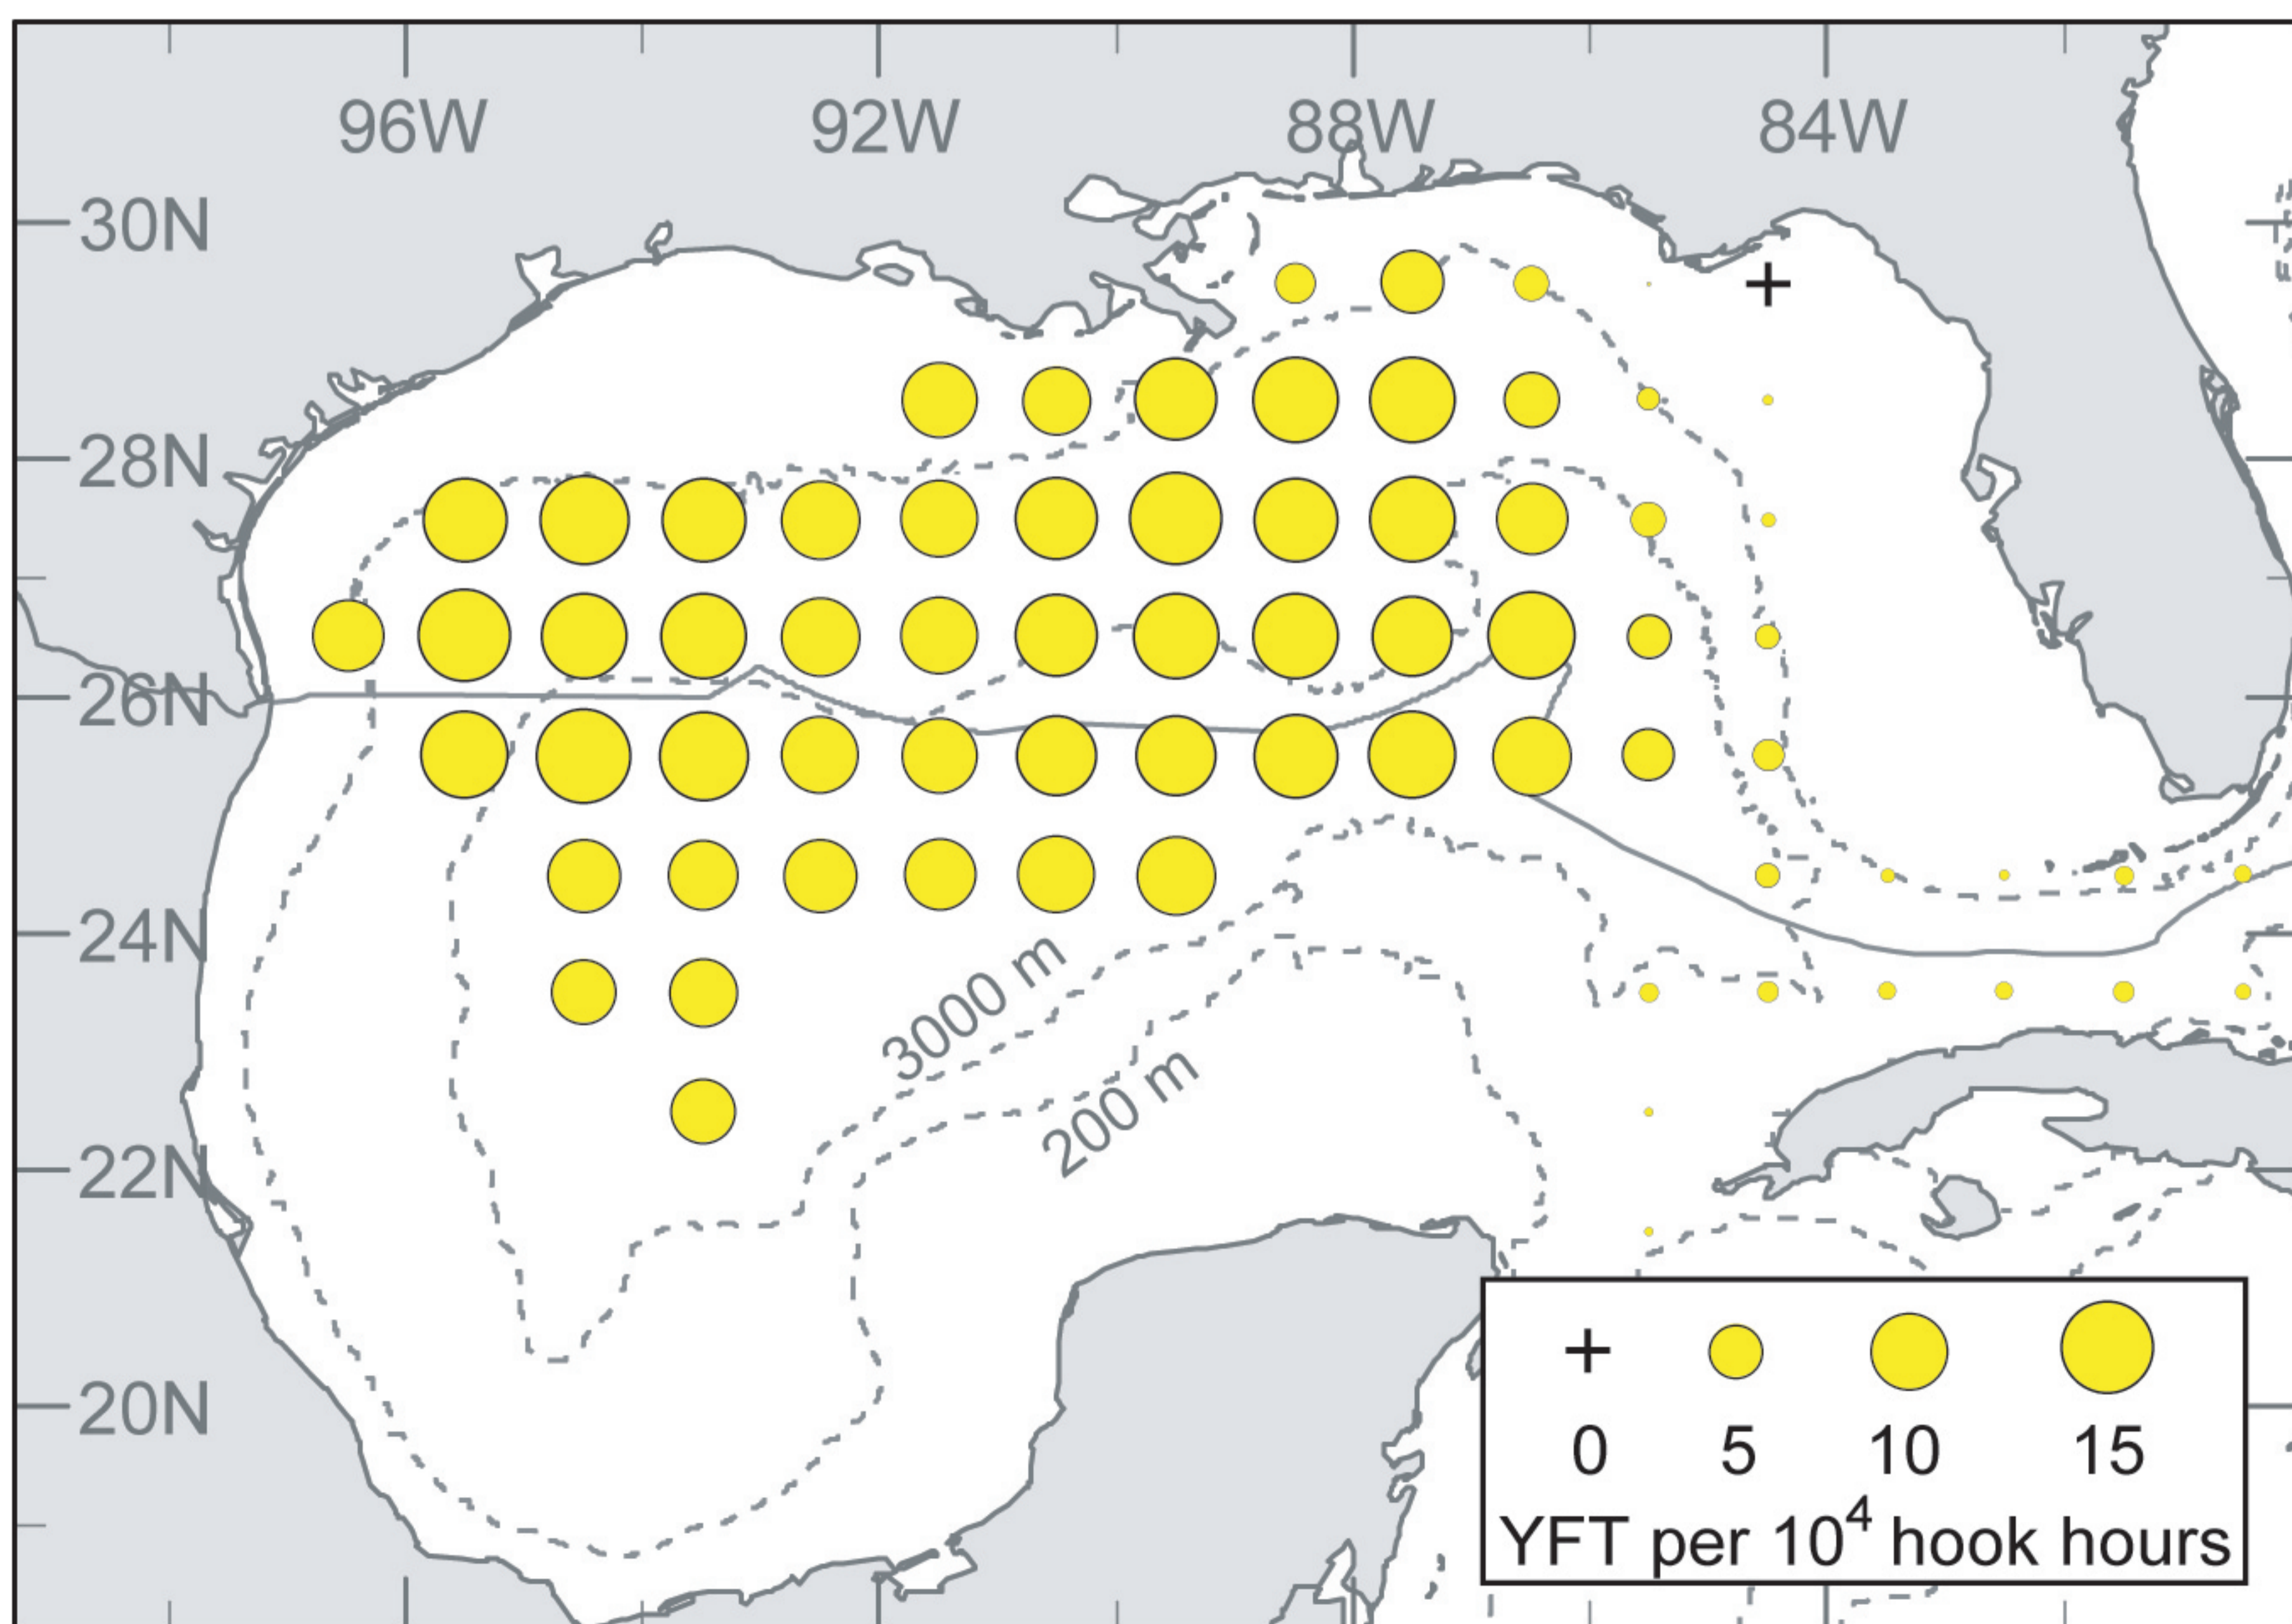

Supplement: 41586_2005_BFnature03463_MOESM3_ESM.pdf [file 41586_2005_BFnature03463_MOESM3_ESM.pdf]
